# Supplementary material for: Mating system of Datura inoxia: association between selfing rates and herkogamy within populations
Source: PeerJ. 2021 Mar 19;9:e10698. doi: 10.7717/peerj.10698 (PMC7983856; doi:10.7717/peerj.10698)
Supplement: Supplemental Information 4 — Herkogamy, outcrossing rate, selfing rate, primary selfing rate, and inbreeding coefficient at equilibrium of families of Datura inoxia from two localities in Mexico. [file peerj-09-10698-s004.xlsx]

## Sheet: BdD Ms VJL_JNF PeerJ 2020
Population	Family	Outcrossing rate (t)	Selfing rate (s)	Herkogamy (mm)	Primary Selfing rate (r)	Inbreeding coefficiet at Equilibrium (Feq)
MAP	Fam3	0.848	0.152	22	0.192	0.082
MAP	Fam11	0.781	0.219	-11.4	0.271	0.123
MAP	Fam12	0.9	0.1	0	0.128	0.053
MAP	Fam15	0.916	0.084	-9	0.108	0.044
MAP	Fam16	0.941	0.059	-9	0.077	0.03
MAP	Fam17	0.958	0.042	2.8	0.055	0.021
MAP	Fam18	0.593	0.407	-6.6	0.477	0.255									0.0898233
MAP	Fam19	0.989	0.011	1	0.015	0.006									0.24625
MAP	Fam25	0.125	0.875	0.66	0.903	0.778
MAP	Fam27	1	0	11.4	0	0
MAP	Fam29	0.833	0.167	0	0.21	0.091
MAP	Fam30	0.55	0.45	11	0.52	0.29
MAP	Fam32	0.619	0.381	14.33	0.45	0.235
MAP	Fam33	0.679	0.321	-6.4	0.385	0.191
MAP	Fam35	0.107	0.893	-9.6	0.917	0.807
MAP	Fam36	0.981	0.019	24.8	0.025	0.01
MAP	Fam38	0.022	0.978	-9.25	0.983	0.957
MAP	Fam39	0.895	0.105	16.8	0.135	0.055
MAP	Fam42	0.289	0.711	0.66	0.765	0.552
MAP	Fam43	0.548	0.452	2.33	0.523	0.292
MAP	Fam50	0.447	0.553	0.2	0.621	0.382
MAP	Fam57	0.528	0.472	-20	0.543	0.309
MAP	Fam58	0.483	0.517	14.4	0.587	0.349
MAP	Fam60	0.986	0.014	15.2	0.018	0.007
MAP	Fam61	0.878	0.122	1.6	0.156	0.065
MAP	Fam62	0.868	0.132	16	0.168	0.071
MAP	Fam63	1	0	10.2	0	0
MAP	Fam64	0.917	0.083	-1.75	0.107	0.043
MAP	Fam69	0.117	0.883	-7.75	0.909	0.791
CM	Fam13	0.477	0.523	-0.9	0.546	0.354
CM	Fam17	0.636	0.364	-2.08	0.386	0.222
CM	Fam23	0.009	0.991	1.58	0.992	0.982
CM	Fam30	0.004	0.996	-8.5	0.996	0.992
CM	Fam34	0	1	1.66	1	1
CM	Fam46	0.801	0.199	-0.36	0.214	0.11
CM	Fam51	0.024	0.976	3.65	0.978	0.953
CM	Fam66	0.11	0.89	-1.68	0.899	0.802
CM	Fam84	0	1	0.56	1	1
CM	Fam87	0.167	0.833	-10.3	0.846	0.714
CM	Fam110	0.163	0.837	-10.14	0.849	0.72
CM	Fam123	0.203	0.797	-9.42	0.812	0.663
CM	Fam126	0.155	0.845	-13.34	0.857	0.732
CM	Fam114ah	0.146	0.854	0.675	0.865	0.745
CM	Fam114bis	0	1	-10.35	1	1
CM	FamEx11bis	0.734	0.266	-13.83	0.285	0.153
CM	FamEx12	1	0	-9.46	0	0
CM	FamEx13	1	0	-10.1	0	0
CM	FamEx14	0.419	0.581	-10.17	0.604	0.409
CM	FamEx19	0	1	-1.1	1	1
CM	FamEx2	0	1	-3.48	1	1
CM	FamEx22	0.419	0.581	1.55	0.604	0.409
CM	FamEx26	0.759	0.241	1.52	0.259	0.137
CM	FamEx3	0.126	0.874	-2	0.884	0.776
CM	FamEx30	0.165	0.835	-0.52	0.848	0.717
CM	FamEx31	0.235	0.765	-9.14	0.781	0.619
CM	FamEx4	0.183	0.817	-0.44	0.831	0.691
Population locality:
MAP, Mapimí
CM, Cañada de Moreno
